# Supplementary material
Source: ML conference proceedings conference paper supplement (https://aclanthology.org/2022.acl-long.286)

overgeneralisation

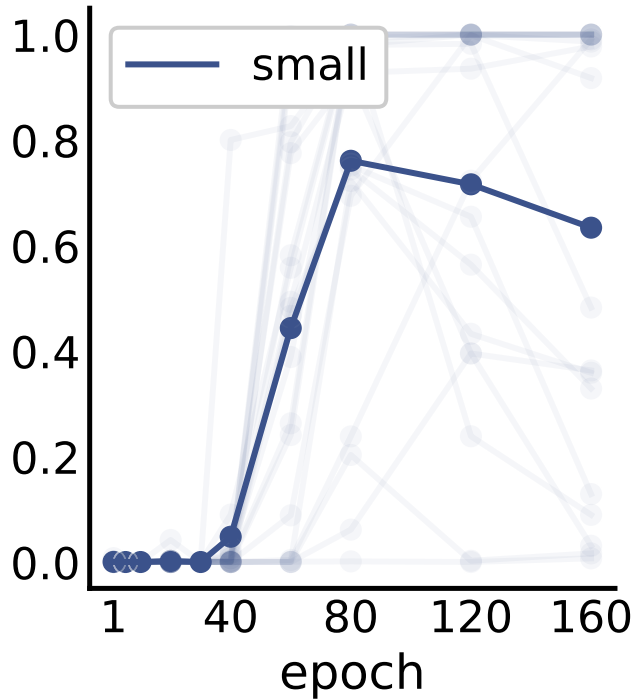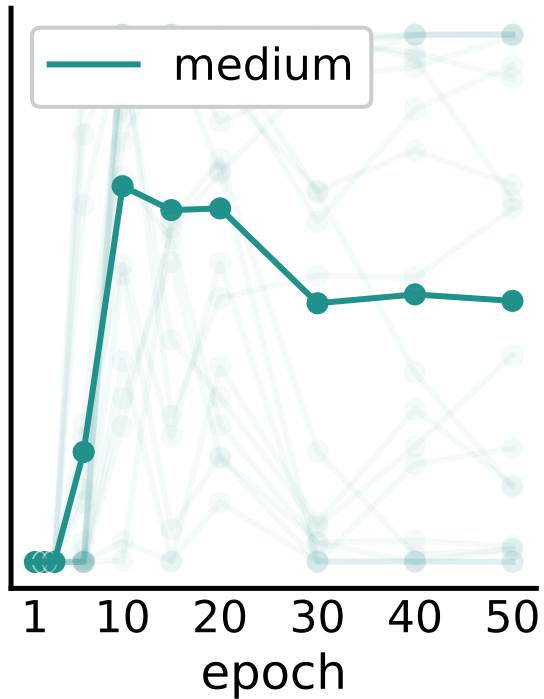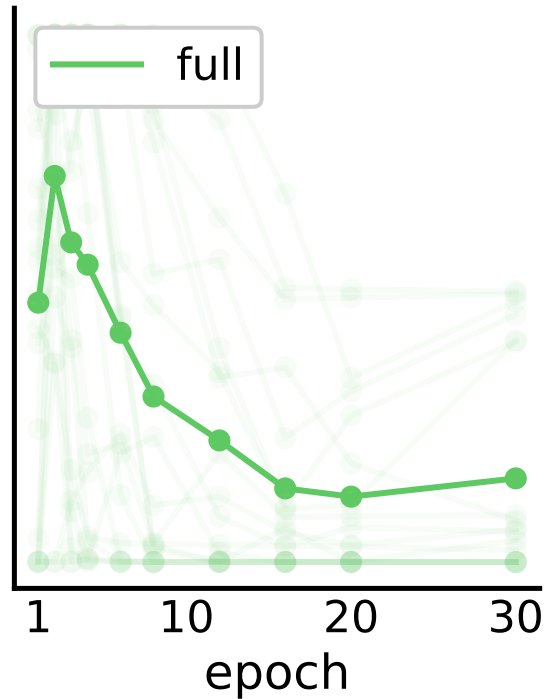

Supplement: software [file 2022.acl-long.286.software.zip]

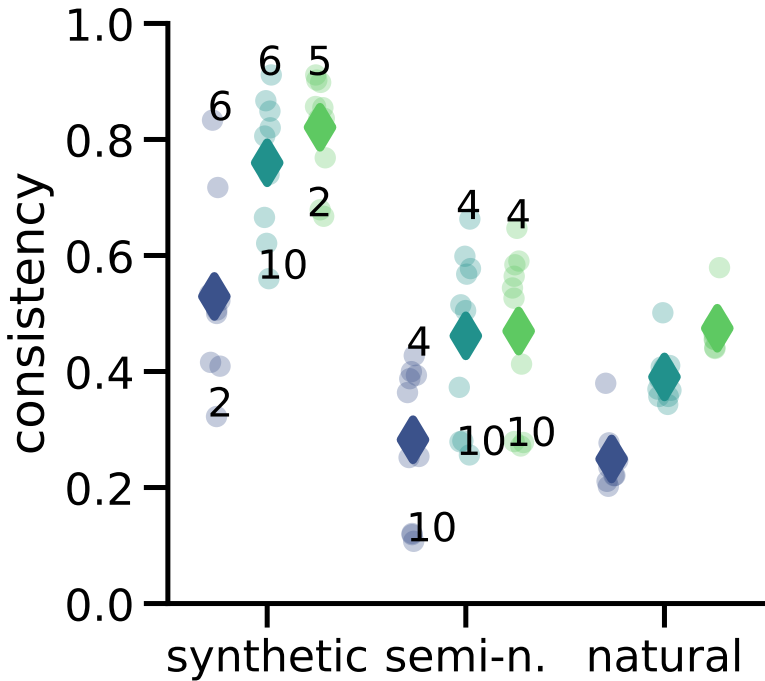

Supplement: software [file 2022.acl-long.286.software.zip]

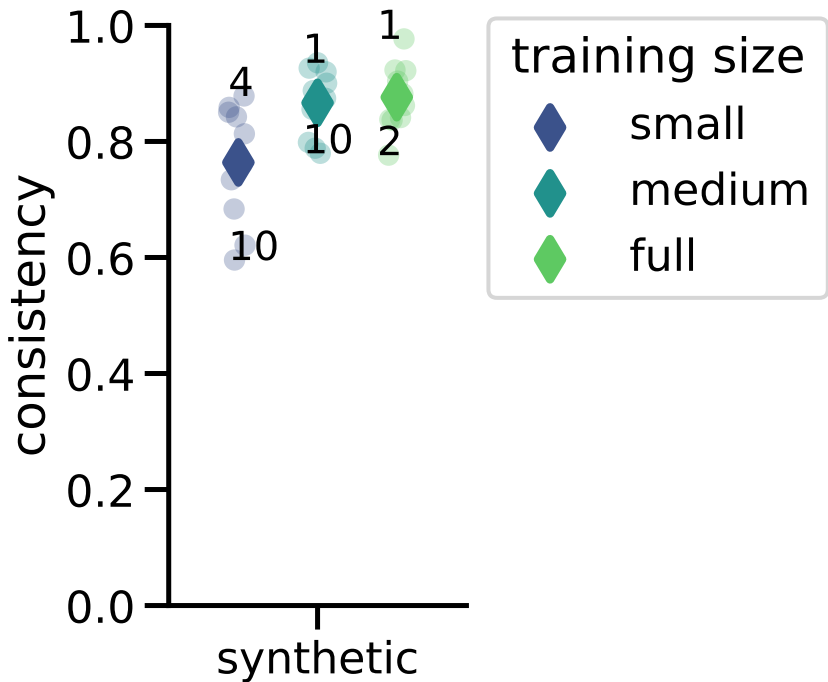

Supplement: software [file 2022.acl-long.286.software.zip]

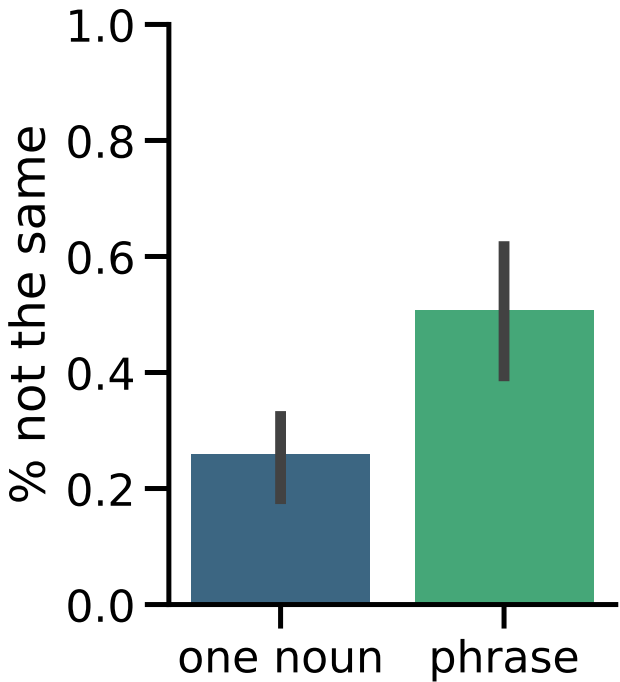

Supplement: software [file 2022.acl-long.286.software.zip]

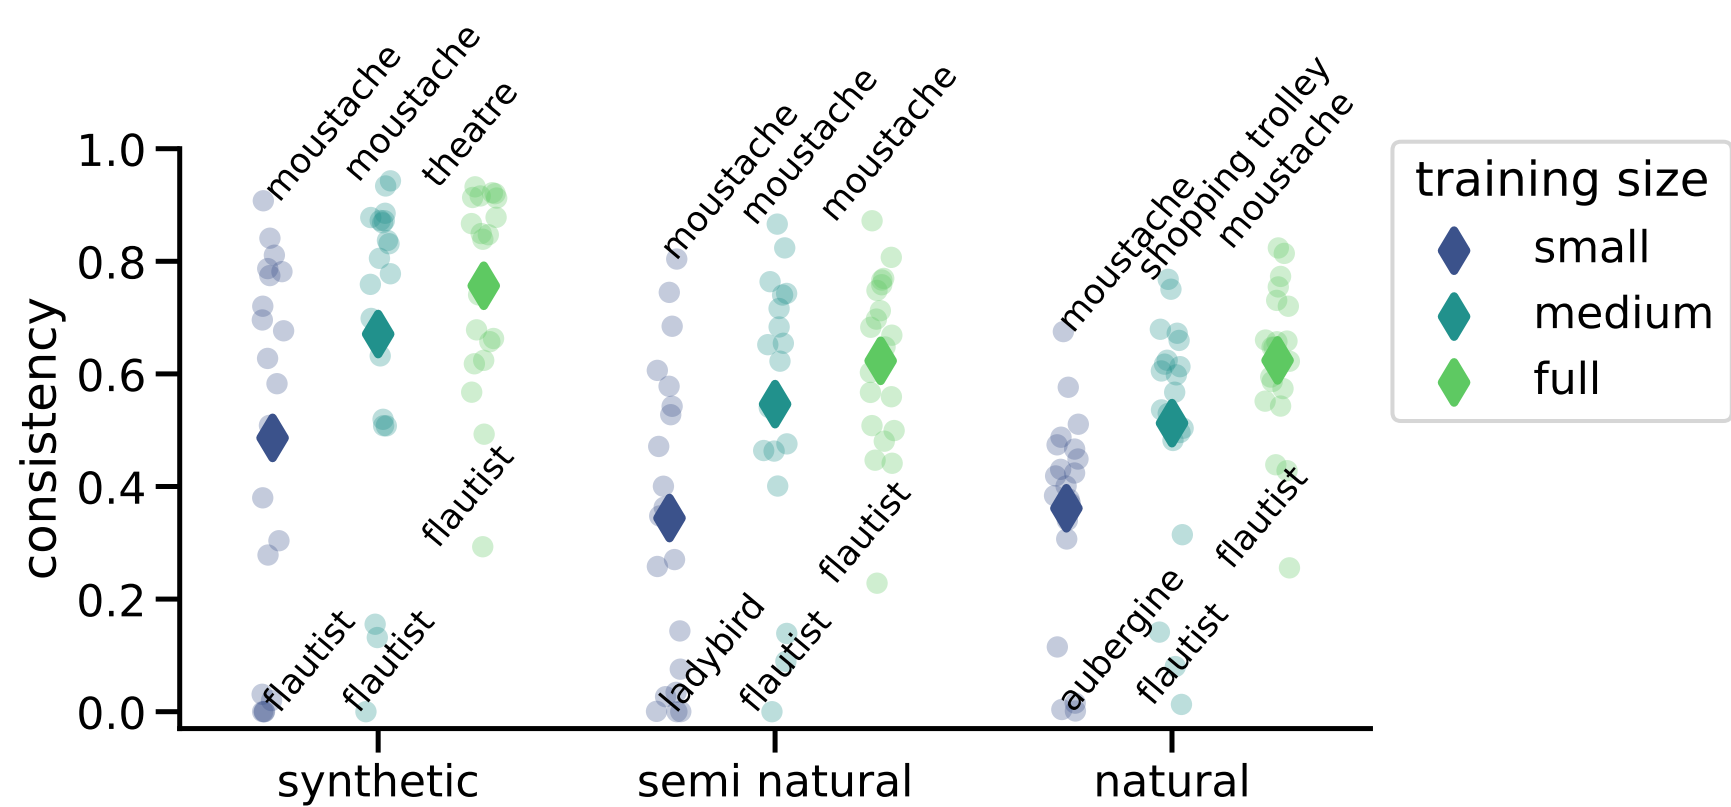

Supplement: software [file 2022.acl-long.286.software.zip]

overgeneralisation

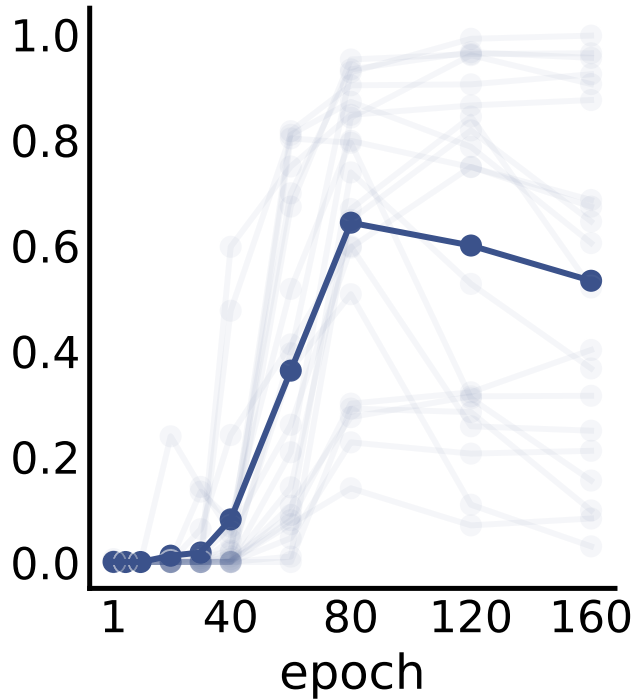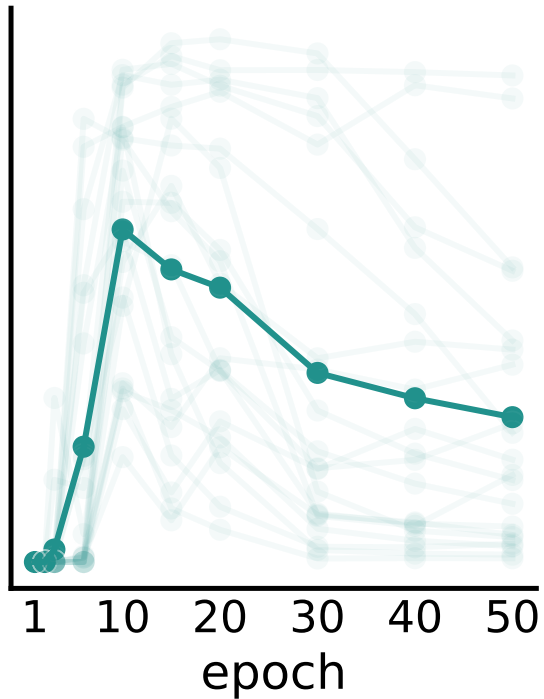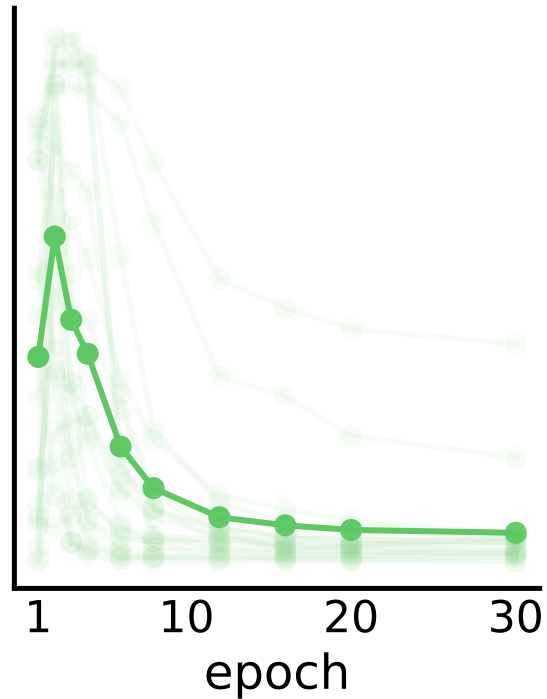

Supplement: software [file 2022.acl-long.286.software.zip]

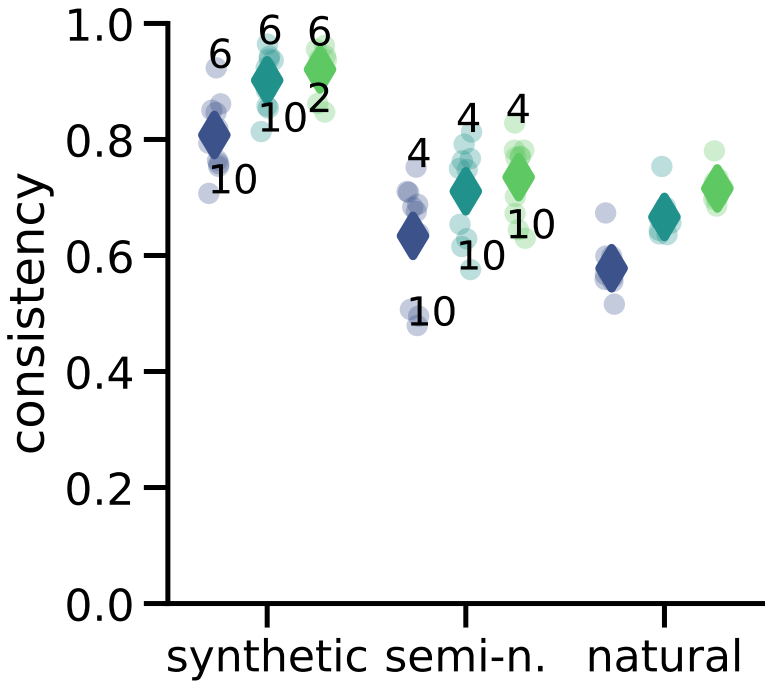

Supplement: software [file 2022.acl-long.286.software.zip]

overgeneralisation

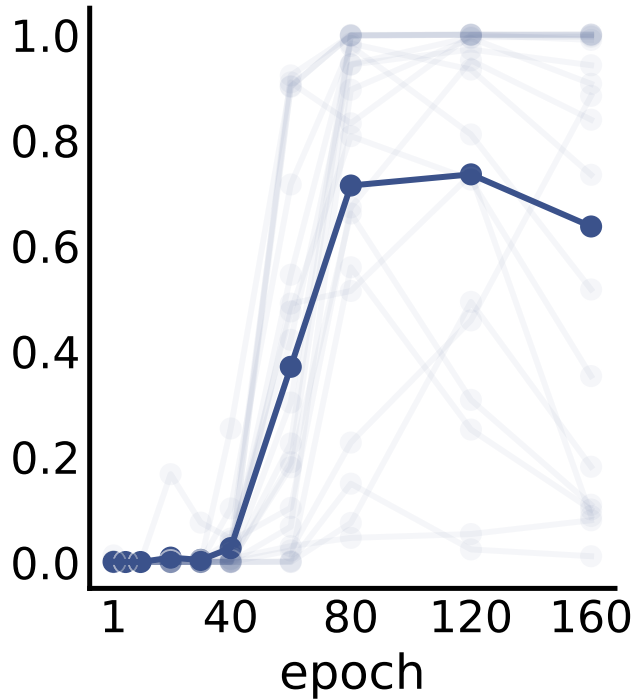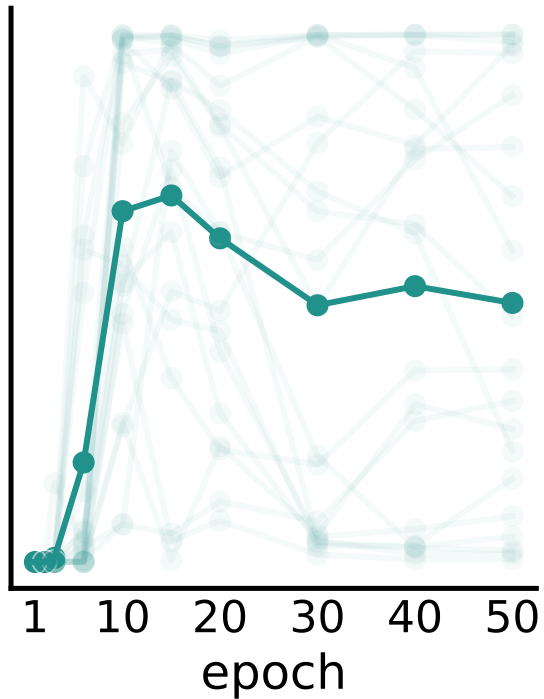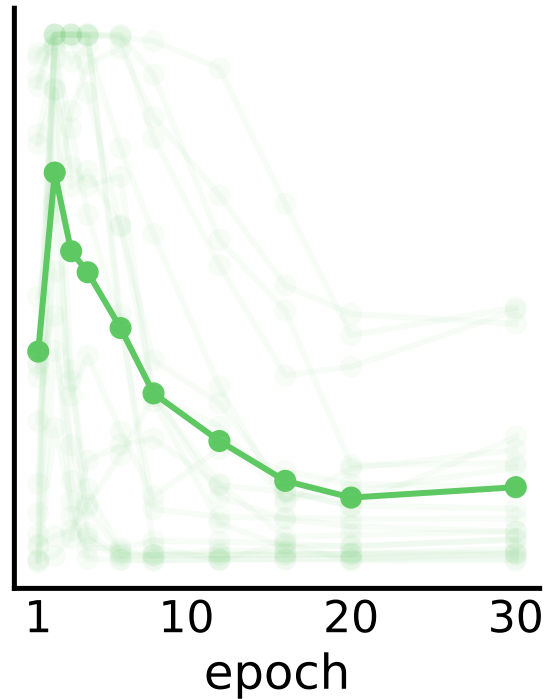

Supplement: software [file 2022.acl-long.286.software.zip]

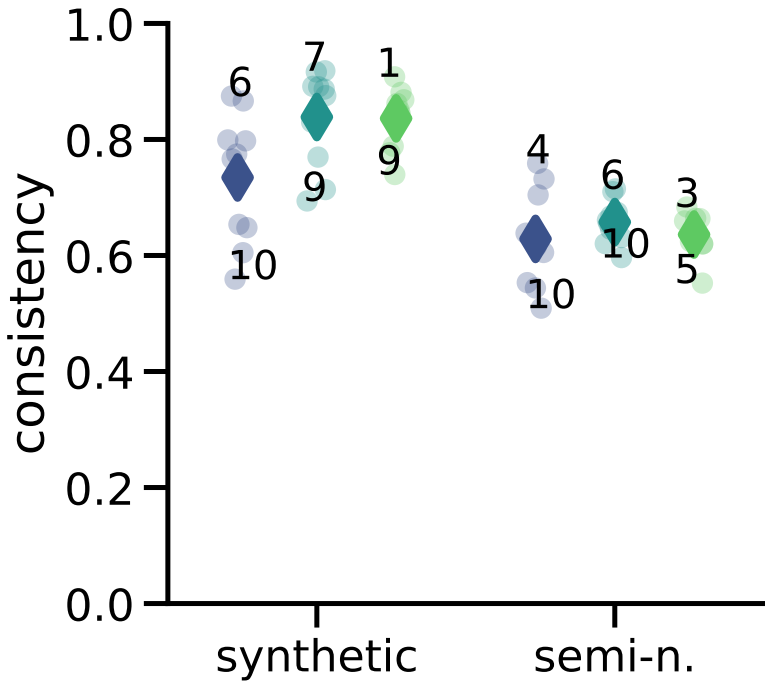

Supplement: software [file 2022.acl-long.286.software.zip]

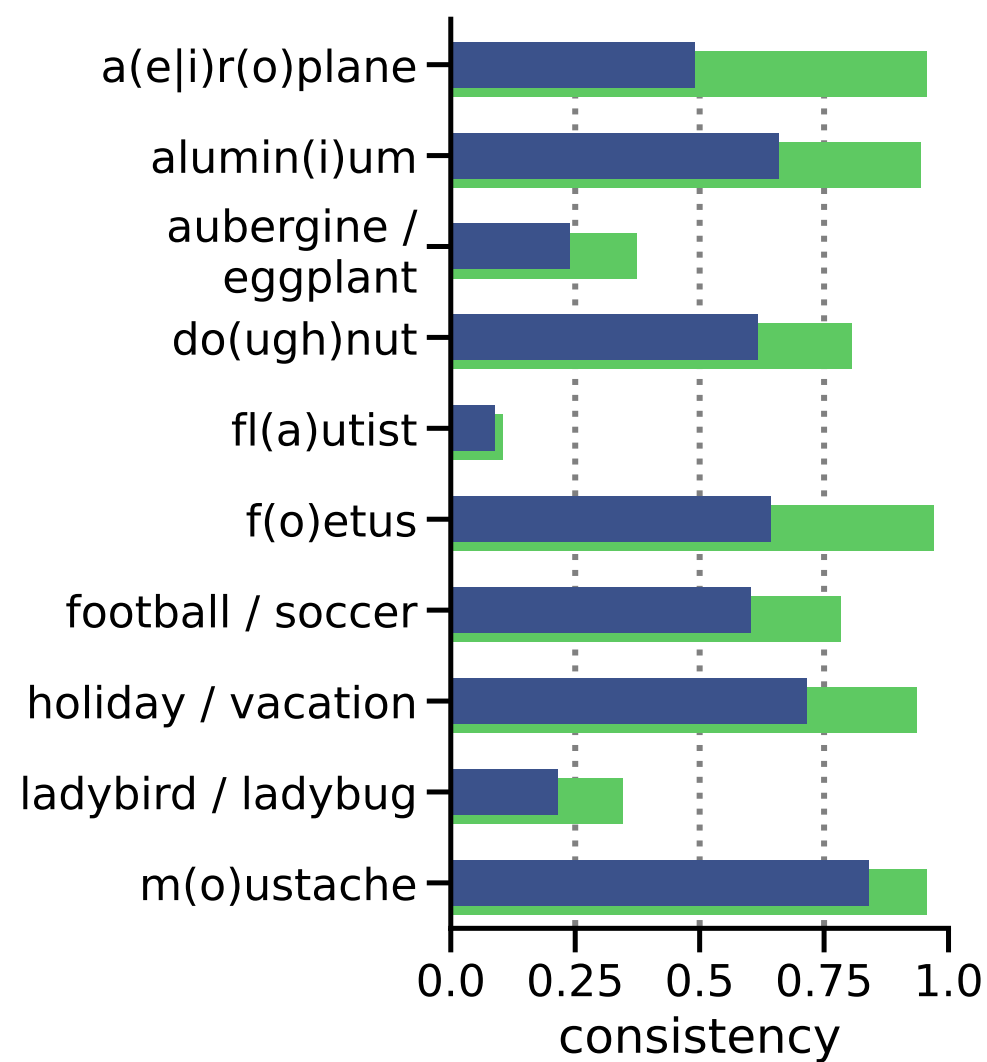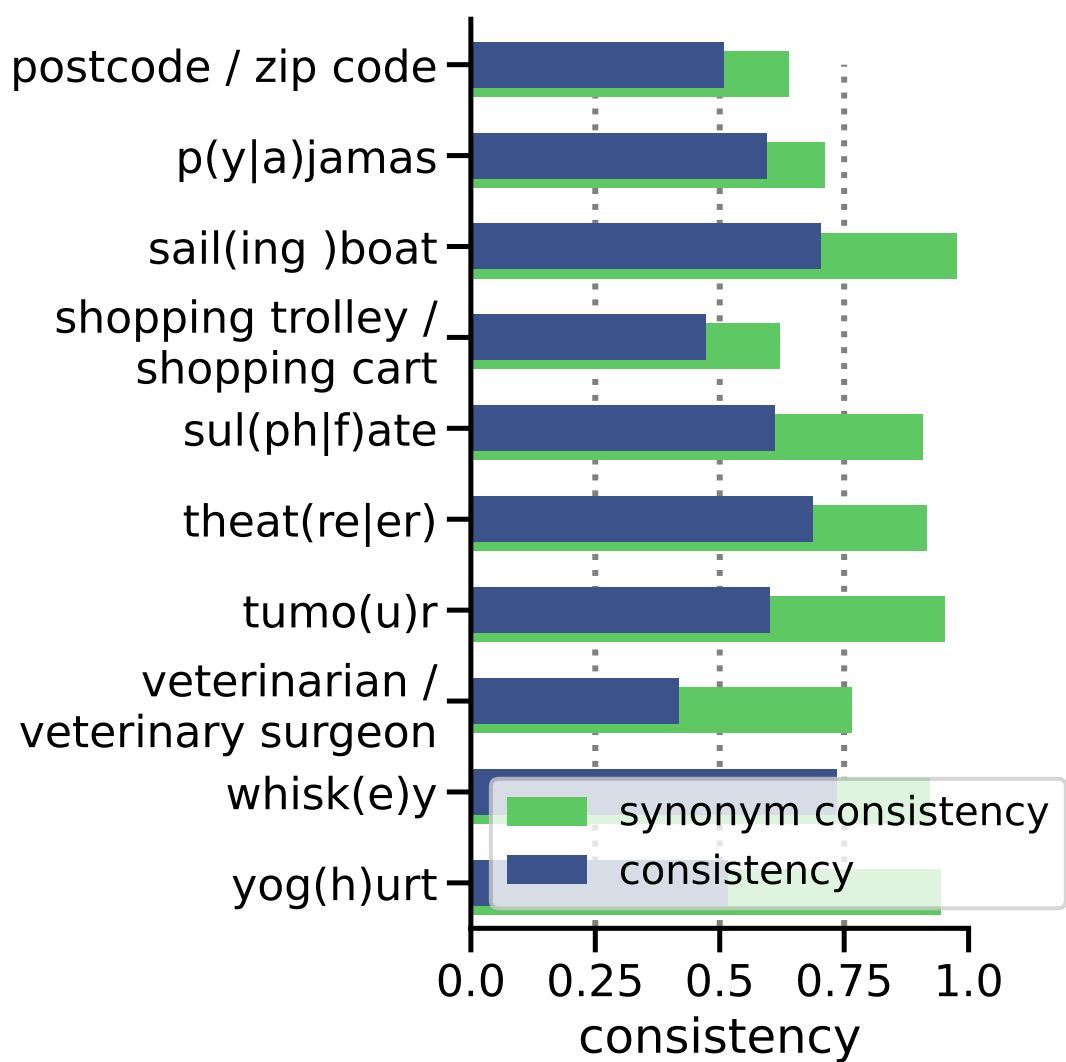

Supplement: software [file 2022.acl-long.286.software.zip]
